# Supplementary material for: Model-potential-free analysis of small angle scattering of proteins in solution: insights into solvent effects on protein–protein interaction
Source: Royal Society of Chemistry journal article supplement (doi:10.1039/c4cp03606a), 2014-01-01
Supplement: c4cp03606a1.pdf [file c4cp03606a1.pdf]

*Model-potential-free analysis of small angle scattering of proteins in solution: insights into solvent effects on protein-protein interaction*

Tomonari Sumi, Hiroshi Imamura, Takeshi Morita, Yasuhiro Isogai, and Keiko Nishikawa

## Electronic Supplementary Information

### A procedure for the model-potential-free analysis

The values of  $\hat{h}'(q)$  for  $q \leq q_h$  in Eq. (4) are fixed as  $\hat{h}_{\text{exp}}(q) = [S_{\text{exp}}(q) - 1]/n_0$  during the iterative calculation for solving the integral equation, whereas the values of  $\hat{h}'(q)$  for  $q > q_h$  in Eq. (4) are updated using the Fourier transform of  $h(r)$  calculated using Eq. (2). The parameter  $q_h$  is the maximum value of a scattering vector for which the experimental  $S_{\text{exp}}(q)$  is available for use. The prime of  $\hat{h}'(q)$  indicates the Fourier-transformed  $h(r)$  after replacement with  $\hat{h}_{\text{exp}}(q)$  for  $q \leq q_h$ .

An initial guess in the iterative calculation is given by the following:

$$\hat{c}(q) = \hat{c}_{\text{HS}}(q), \quad (\text{A1})$$

$$\hat{\gamma}_s(q) = \hat{\gamma}_s^{\text{old}}(q) = 0, \quad (\text{A2})$$

$$\hat{h}^{\text{old}}(q) = \hat{h}_{\text{HS}}(q), \quad (\text{A3})$$

$$\hat{h}'(q) = \begin{cases} \hat{h}_{\text{exp}}(q) & q \leq q_h \\ \hat{h}_{\text{HS}}(q) & q > q_h \end{cases}, \quad (\text{A4})$$

where  $\hat{h}_{\text{HS}}(q)$  is obtained from the hard-sphere reference system.

The following iterative calculation is continued until the absolute difference between  $\hat{h}(q)$  and  $\hat{h}^{\text{old}}(q)$  becomes less than a threshold.

$$1. \hat{c}_{\text{ex}}(q) = \hat{c}(q) - \hat{c}_{\text{HS}}(q). \quad (\text{A5})$$

$$2. \hat{c}(q) = \hat{h}'(q) - [\hat{\gamma}_s(q) - \hat{c}_{\text{ex}}(q)]. \quad (\text{A6})$$

$$3. \hat{\gamma}_s(q) = \hat{c}(q) / [1 - n_0 \hat{c}(q)] - \hat{c}_{\text{HS}}(q). \quad (\text{A7})$$

$$4. \hat{\gamma}_s(q) = a \hat{\gamma}_s(q) + (1 - a) \hat{\gamma}_s^{\text{old}}(q), \text{ where } a \text{ is the dumping parameter.} \quad (\text{A8})$$

$$5. \hat{\gamma}_s^{\text{old}}(q) = \hat{\gamma}_s(q). \quad (\text{A9})$$

$$6. h(r) = \begin{cases} \exp[\gamma_s(r) + B(r)] - 1 & r > d_{\text{HS}} \\ -1 & r \leq d_{\text{HS}} \end{cases}. \quad (\text{A10})$$

7. If the difference between  $\hat{h}(q)$  and  $\hat{h}^{\text{old}}(q)$  becomes less than the threshold, go to step 8 (outside the loop of the iterative calculation); otherwise, we update as  $\hat{h}^{\text{old}}(q) = \hat{h}(q)$  and  $\hat{h}'(q) = \hat{h}(q)$  for  $q > q_h$ , go back to step 1.

$$8. S(q) \text{ is calculated as } S(q) = 1 + n_0 \hat{h}(q).$$

### A comparison between the experimental raw $S(q)$ and its smoothed $S(q)$

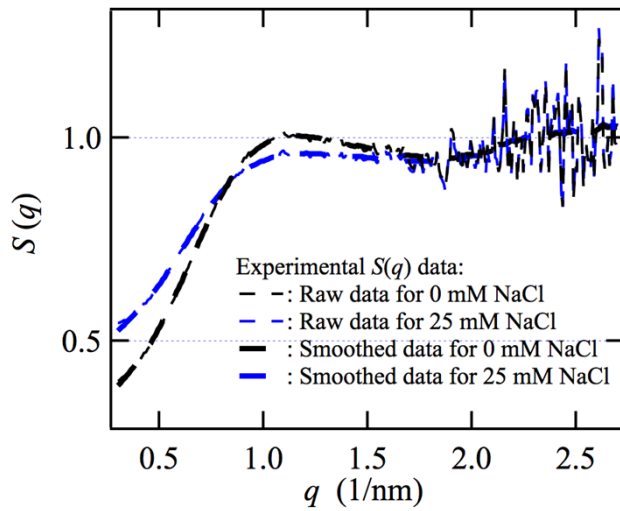

Fig. S1 The experimental raw structure factor  $S_{\text{exp}}(q)$  that was directly obtained from dividing the raw scattering intensity  $I_{\text{exp}}(q)$  for 10 wt% dense lysozyme solutions by a form experimental factor  $P_{\text{exp}}(q)$  and its smoothed  $S_{\text{exp}}(q)$ . The form factor  $P_{\text{exp}}(q)$  was determined from the scattering intensity  $I_{\text{exp}}(q)$  for 0.26 wt% diluted lysozyme solution via  $P_{\text{exp}}(q) = I_{\text{exp}}(q) - 0.0135 \times I_{\text{exp}}(q=0)$ . Here,  $I_{\text{exp}}(q=0)$  is an extrapolation value of  $I_{\text{exp}}(q)$  toward the low- $q$  limit with a Gaussian function. The factor  $0.0135 \times I_{\text{exp}}(q=0)$  is a base line correction we introduced so that the values of  $S(q)$  should not deviate from 1 at high- $q$  values. In order to obtain the smoothed  $S(q)$  data as shown in Fig. S1, we applied the Savitzky–Golay smoothing to the experimental raw data of  $S(q)$ .

## A comparison between experimental and theoretical scattering intensities

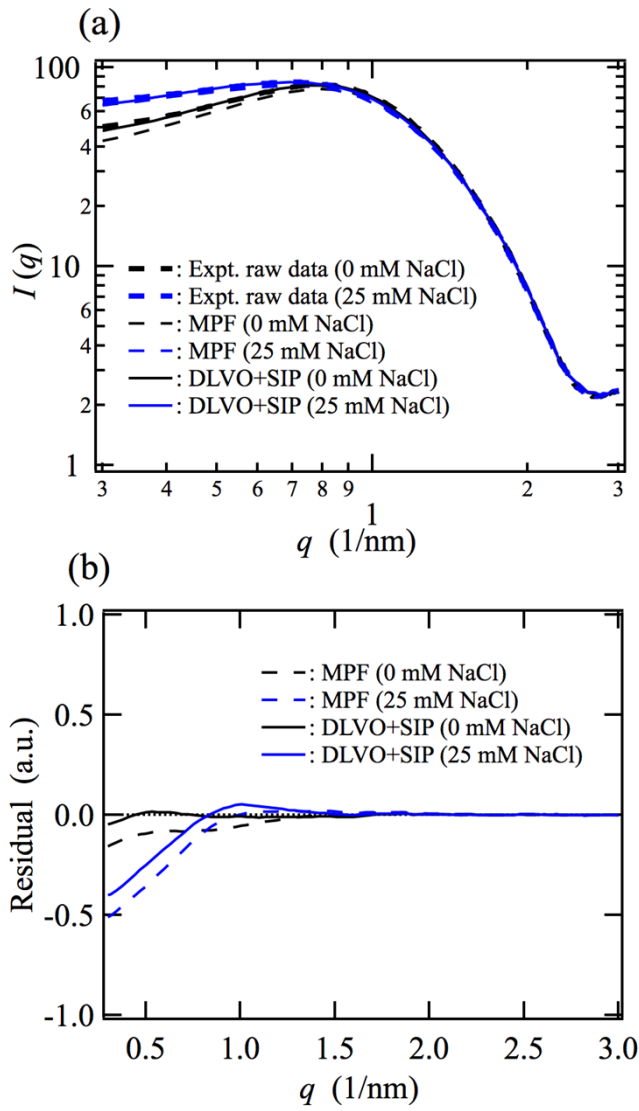

Fig. S2 (a) The experimental raw scattering intensity  $I(q)$  and the theoretical  $I(q)$  that was obtained from the product of the theoretical structure factor  $S(q)$  and the form factor  $P(q)$ . (b) The differences between the theoretical  $I(q)$  and the experimental raw  $I(q)$ .
